# Supplementary material for: Prospects for Using Expression Patterns of Paramyxovirus Receptors as Biomarkers for Oncolytic Virotherapy
Source: PubMed Central journal article supplement (PMC7762160; doi:10.3390/cancers12123659), 2020-12-05
Supplement: cancers-12-03659-s001.pdf [file cancers-12-03659-s001.pdf]

# Supplementary Materials:

## Prospects for Using Expression Patterns of Paramyxovirus Receptors as Biomarkers for Oncolytic Virotherapy

Olga V. Matveeva and Svetlana A. Shabalina

**Table S1.** Processing transferases for Sendai virus receptors..

| Receptor.<br>Ganglioside (Sialilated<br>Glycosphingolipid) | Glycosyltransferase | Type of Malignancy                                                                                                                    | Ref.  |
|------------------------------------------------------------|---------------------|---------------------------------------------------------------------------------------------------------------------------------------|-------|
| GD1a                                                       | ST3Gal1             | Glioblastoma (ST3Gal1 defines metastatic invasiveness.)                                                                               | [1]   |
|                                                            |                     | Ovarian carcinoma                                                                                                                     | [2]   |
|                                                            |                     | Breast carcinomas                                                                                                                     | [3]   |
|                                                            |                     | Colorectal cancer                                                                                                                     | [4,5] |
|                                                            |                     | Bladder cancer (ST3Gal1 is high in cancers with tendency to recurrence.)                                                              | [6]   |
| GD1a, GT1b                                                 | ST3GAL2             | Colorectal cancer                                                                                                                     | [4]   |
|                                                            |                     | Breast cancer stem cells                                                                                                              | [7]   |
| Sialo-sylparagloboside (SPG)                               |                     | One major ganglioside of lymphoid leukemia                                                                                            | [8,9] |
| SPG                                                        | ST3GAL6             | Hepatocellular carcinoma                                                                                                              | [10]  |
|                                                            |                     | Multiple myeloma (ST3GAL6 influences malignant cells homing and survival.)                                                            | [11]  |
| GD1a                                                       | ST6GALNAC4          | Lung cancer metastases                                                                                                                | [12]  |
| GD1a, GT1a and GQ1                                         | ST6GALNAC5          | Colorectal carcinomas (SNP polymorphism is related to occurrence of brain metastases)                                                 | [13]  |
|                                                            |                     | Breast cancer (ST6GALNAC5 enhances metastatic cells adhesion to brain endothelial cells and passage through the blood-brain barrier.) | [14]  |
|                                                            |                     | Lung adenocarcinoma                                                                                                                   | [15]  |
| GD1a                                                       | ST6GALNAC6          | Renal cancers                                                                                                                         | [16]  |
| GT1a, GT1b                                                 |                     | Colon cancer                                                                                                                          | [17]  |
| GP1c and GQ1                                               |                     |                                                                                                                                       |       |

**Table S2.** Overexpression of processing transferases for Sendai virus receptors in malignancies.

| Receptor<br>Ganglioside (Sialilated<br>Glycosphingolipid) | Glycosyltransferase | Type of Malignancy                                                       | Ref.    |
|-----------------------------------------------------------|---------------------|--------------------------------------------------------------------------|---------|
| GD1a                                                      | ST3Gal1             | Glioblastoma (ST3Gal1 defines metastatic invasiveness.)                  | [7]     |
|                                                           |                     | Ovarian carcinoma                                                        | [8]     |
|                                                           |                     | Breast carcinomas                                                        | [9]     |
|                                                           |                     | Colorectal cancer                                                        | [10,11] |
|                                                           |                     | Bladder cancer (ST3Gal1 is high in cancers with tendency to recurrence.) | [12]    |
| GD1a, GT1b                                                | ST3GAL2             | Colorectal cancer                                                        | [10]    |
|                                                           |                     | Breast cancer stem cells                                                 | [13]    |

|                             |            |                                                                                                                                       |         |
|-----------------------------|------------|---------------------------------------------------------------------------------------------------------------------------------------|---------|
| Sialosylparagloboside (SPG) |            | One major ganglioside of lymphoid leukemia                                                                                            | [14,15] |
|                             | ST3GAL6    | Hepatocellular carcinoma                                                                                                              | [16]    |
| SPG                         |            | Multiple myeloma (ST3GAL6 influences malignant cells homing and survival.)                                                            | [17]    |
|                             |            | Melanoma                                                                                                                              | [18-20] |
| GD1a                        | ST6GALNAC4 | Lung cancer metastases                                                                                                                | [21]    |
|                             |            | Colorectal carcinomas (SNP polymorphism is related to occurrence of brain metastases)                                                 | [22]    |
| GD1a, GT1a and GQ1          | ST6GALNAC5 | Breast cancer (ST6GALNAC5 enhances metastatic cells adhesion to brain endothelial cells and passage through the blood-brain barrier.) | [23]    |
| GD1a                        |            | Lung adenocarcinoma                                                                                                                   | [24]    |
| GT1a, GT1b                  | ST6GALNAC6 | Renal cancers                                                                                                                         | [25]    |
| GP1c and GQ1                |            | Colon cancer                                                                                                                          | [26]    |

## References

- Britten, C.J.; Bird, M.I. Chemical modification of an alpha 3-fucosyltransferase; definition of amino acid residues essential for enzyme activity. *Biochim. Biophys. Acta* **1997**, *1334*, 57–64.
- Ngamukote, S.; Yanagisawa, M.; Ariga, T.; Ando, S.; Yu, R.K. Developmental changes of glycosphingolipids and expression of glycogenes in mouse brains. *J. Neurochem.* **2007**, *103*, 2327–2341, doi:10.1111/j.1471-4159.2007.04910.x.
- Okajima, T.; Chen, H.H.; Ito, H.; Kiso, M.; Tai, T.; Furukawa, K.; Urano, T.; Furukawa, K. Molecular cloning and expression of mouse GD1alpha/GT1alpha/GQ1alpha synthase (ST6GalNAc VI) gene. *J. Biol. Chem.* **2000**, *275*, 6717–6723.
- Chandrasekaran, E.V.; Xue, J.; Xia, J.; Locke, R.D.; Patil, S.A.; Neelamegham, S.; Matta, K.L. Mammalian sialyltransferase ST3Gal-II: its exchange sialylation catalytic properties allow labeling of sialyl residues in mucin-type sialylated glycoproteins and specific gangliosides. *Biochemistry* **2011**, *50*, 9475–9487, doi:10.1021/bi200301w.
- Hatano, K.; Miyamoto, Y.; Nonomura, N.; Kaneda, Y. Expression of gangliosides, GD1a, and sialyl paragloboside is regulated by NF-kappaB-dependent transcriptional control of alpha2,3-sialyltransferase I, II, and VI in human castration-resistant prostate cancer cells. *Int. J. Cancer* **2011**, *129*, 1838–1847, doi:10.1002/ijc.25860.
- Vandermeersch, S.; Vanbeselaere, J.; Delannoy, C.P.; Drolez, A.; Mysiorek, C.; Guerardel, Y.; Delannoy, P.; Julien, S. Accumulation of GD1alpha Ganglioside in MDA-MB-231 Breast Cancer Cells Expressing ST6GalNAc V. *Molecules* **2015**, *20*, 6913–6924, doi:10.3390/molecules20046913.
- Chong, Y.K.; Sandanaraj, E.; Koh, L.W.; Thangaveloo, M.; Tan, M.S.; Koh, G.R.; Toh, T.B.; Lim, G.G.; Holbrook, J.D.; Kon, O.L., et al. ST3GAL1-Associated Transcriptomic Program in Glioblastoma Tumor Growth, Invasion, and Prognosis. *J. Natl. Cancer Inst.* **2016**, *108*, doi:10.1093/jnci/djv326.
- Wang, P.H.; Lee, W.L.; Juang, C.M.; Yang, Y.H.; Lo, W.H.; Lai, C.R.; Hsieh, S.L.; Yuan, C.C. Altered mRNA expressions of sialyltransferases in ovarian cancers. *Gynecol. Oncol.* **2005**, *99*, 631–639, doi:10.1016/j.ygyno.2005.07.016.
- Burchell, J.; Poulson, R.; Hanby, A.; Whitehouse, C.; Cooper, L.; Clausen, H.; Miles, D.; Taylor-Papadimitriou, J. An alpha2,3 sialyltransferase (ST3Gal I) is elevated in primary breast carcinomas. *Glycobiology* **1999**, *9*, 1307–1311.
- Schneider, F.; Kemmner, W.; Haensch, W.; Franke, G.; Gretschel, S.; Karsten, U.; Schlag, P.M. Overexpression of sialyltransferase CMP-sialic acid:Galbeta1,3GalNAc-R alpha6-Sialyltransferase is related to poor patient survival in human colorectal carcinomas. *Cancer Res.* **2001**, *61*, 4605–4611.
- Kudo, T.; Ikehara, Y.; Togayachi, A.; Morozumi, K.; Watanabe, M.; Nakamura, M.; Nishihara, S.; Narimatsu, H. Up-regulation of a set of glycosyltransferase genes in human colorectal cancer. *Lab. Invest.* **1998**, *78*, 797–811.
- Videira, P.A.; Correia, M.; Malagolini, N.; Crespo, H.J.; Ligeiro, D.; Calais, F.M.; Trindade, H.; Dall'Olio, F. ST3Gal.I sialyltransferase relevance in bladder cancer tissues and cell lines. *BMC Cancer* **2009**, *9*, 357, doi:10.1186/1471-2407-9-357.

13. Liang, Y.J.; Ding, Y.; Levery, S.B.; Lobaton, M.; Handa, K.; Hakomori, S.I. Differential expression profiles of glycosphingolipids in human breast cancer stem cells vs. cancer non-stem cells. *Proc. Natl. Acad. Sci. USA* **2013**, *110*, 4968–4973, doi:10.1073/pnas.1302825110.
14. Westrick, M.A.; Lee, W.M.; Macher, B.A. Isolation and characterization of gangliosides from chronic myelogenous leukemia cells. *Cancer Res.* **1983**, *43*, 5890–5894.
15. Merritt, W.D.; Szein, M.B.; Taylor, B.; Reaman, G.H. Immunoreactivity of leukemic lymphoblasts of T-cell and B-cell precursor origin with monoclonal anti-GD3 and anti-GM3 antibodies. *Leukemia* **1991**, *5*, 1087–1091.
16. Sun, M.; Zhao, X.; Liang, L.; Pan, X.; Lv, H.; Zhao, Y. Sialyltransferase ST3GAL6 mediates the effect of microRNA-26a on cell growth, migration, and invasion in hepatocellular carcinoma through the protein kinase B/mammalian target of rapamycin pathway. *Cancer Sci.* **2017**, *108*, 267–276, doi:10.1111/cas.13128.
17. Glavey, S.V.; Manier, S.; Natoni, A.; Sacco, A.; Moschetta, M.; Reagan, M.R.; Murillo, L.S.; Sahin, I.; Wu, P.; Mishima, Y., et al. The sialyltransferase ST3GAL6 influences homing and survival in multiple myeloma. *Blood* **2014**, *124*, 1765–1776, doi:10.1182/blood-2014-03-560862.
18. Uhlen, M.; Fagerberg, L.; Hallstrom, B.M.; Lindskog, C.; Oksvold, P.; Mardinoglu, A.; Sivertsson, A.; Kampf, C.; Sjostedt, E.; Asplund, A., et al. Proteomics. Tissue-based map of the human proteome. *Science* **2015**, *347*, 1260419, doi:10.1126/science.1260419.
19. Uhlen, M.; Zhang, C.; Lee, S.; Sjostedt, E.; Fagerberg, L.; Bidkhorji, G.; Benfeitas, R.; Arif, M.; Liu, Z.; Edfors, F., et al. A pathology atlas of the human cancer transcriptome. *Science* **2017**, *357*, doi:10.1126/science.aan2507.
20. Human Protein Atlas. Retrieved June 20, 2018, from <https://www.proteinatlas.org/>.
21. Reticker-Flynn, N.E.; Bhatia, S.N. Aberrant glycosylation promotes lung cancer metastasis through adhesion to galectins in the metastatic niche. *Cancer Discov.* **2015**, *5*, 168–181, doi:10.1158/2159-8290.CD-13-0760.
22. Stremitzer, S.; Berghoff, A.S.; Volz, N.B.; Zhang, W.; Yang, D.; Stintzing, S.; Ning, Y.; Sunakawa, Y.; Yamauchi, S.; Sebio, A., et al. Genetic variants associated with colorectal brain metastases susceptibility and survival. *Pharm. J.* **2017**, *17*, 29–35, doi:10.1038/tpj.2015.86.
23. Bos, P.D.; Zhang, X.H.; Nadal, C.; Shu, W.; Gomis, R.R.; Nguyen, D.X.; Minn, A.J.; van de Vijver, M.J.; Gerald, W.L.; Foekens, J.A., et al. Genes that mediate breast cancer metastasis to the brain. *Nature* **2009**, *459*, 1005–1009, doi:10.1038/nature08021.
24. Hsu, M.K.; Wu, I.C.; Cheng, C.C.; Su, J.L.; Hsieh, C.H.; Lin, Y.S.; Chen, F.C. Triple-layer dissection of the lung adenocarcinoma transcriptome: regulation at the gene, transcript, and exon levels. *Oncotarget* **2015**, *6*, 28755–28773, doi:10.18632/oncotarget.4810.
25. Senda, M.; Ito, A.; Tsuchida, A.; Hagiwara, T.; Kaneda, T.; Nakamura, Y.; Kasama, K.; Kiso, M.; Yoshikawa, K.; Katagiri, Y., et al. Identification and expression of a sialyltransferase responsible for the synthesis of disialylgalactosylgloboside in normal and malignant kidney cells: downregulation of ST6GalNAc VI in renal cancers. *Biochem. J.* **2007**, *402*, 459–470, doi:10.1042/BJ20061118.
26. Tsuchida, A.; Okajima, T.; Furukawa, K.; Ando, T.; Ishida, H.; Yoshida, A.; Nakamura, Y.; Kannagi, R.; Kiso, M.; Furukawa, K. Synthesis of disialyl Lewis a (Le(a)) structure in colon cancer cell lines by a sialyltransferase, ST6GalNAc VI, responsible for the synthesis of alpha-series gangliosides. *J. Biol. Chem.* **2003**, *278*, 22787–22794, doi:10.1074/jbc.M211034200.
